# Supplementary material for: The intercentriolar fibers function as docking sites of centriolar satellites for cilia assembly
Source: PubMed Central journal article supplement (PMC10901237; doi:10.1083/jcb.202105065), 2024-02-28

# SourceDataF8D

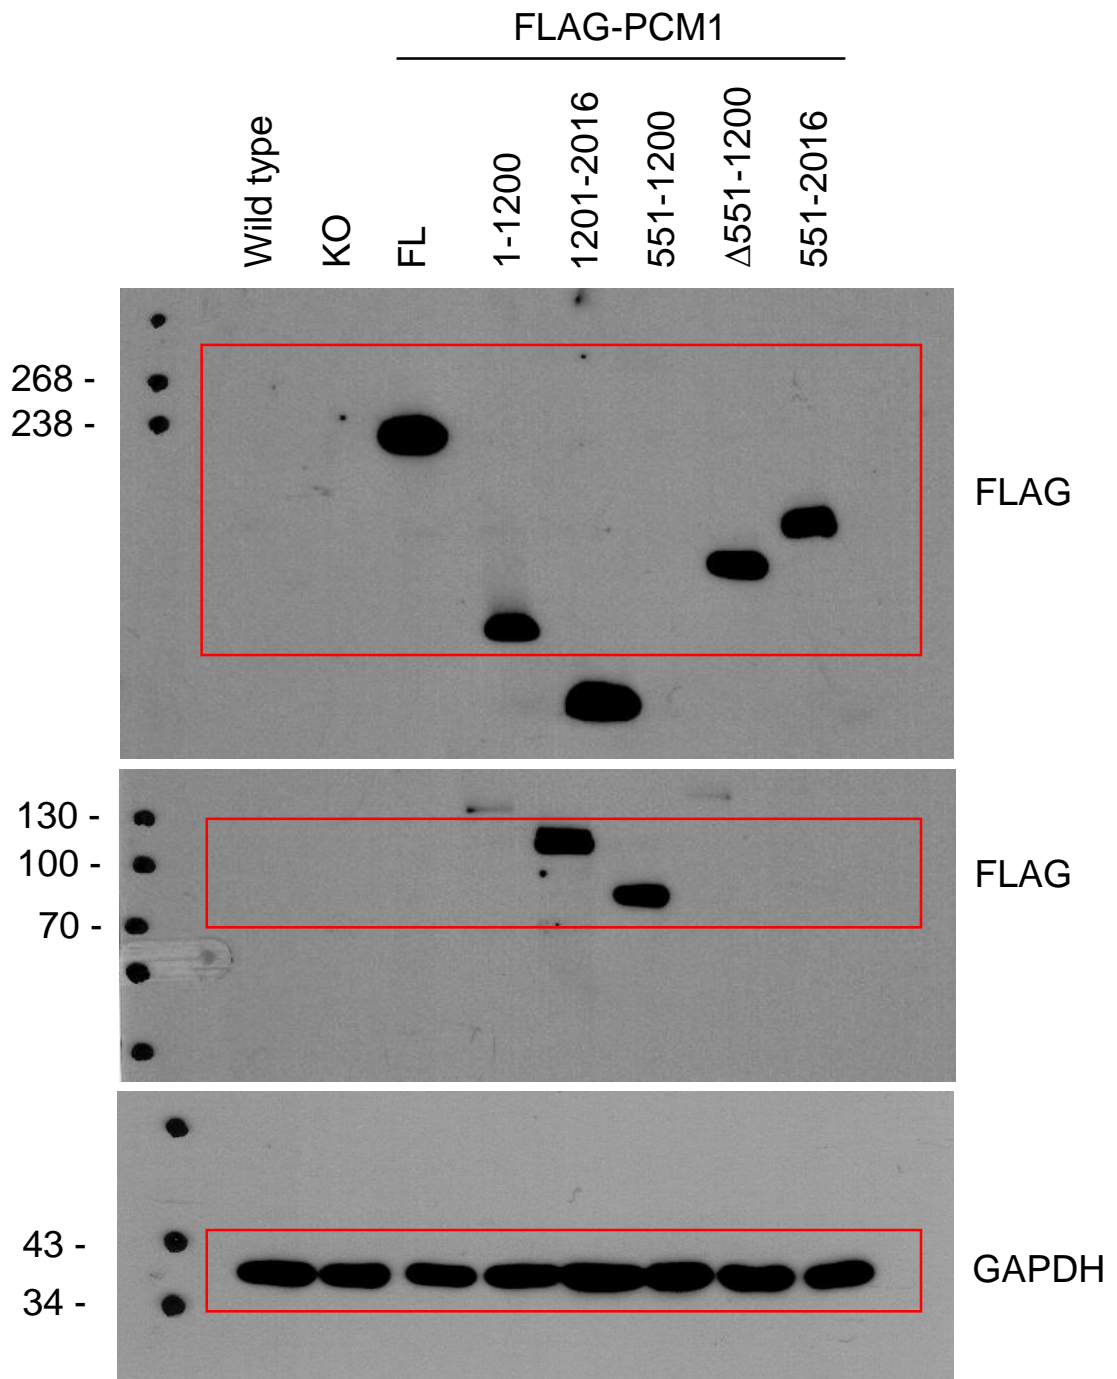

Supplement: JCB_202105065_SourceDataF8.pdf [file JCB_202105065_SourceDataF8.pdf]
